# Supplementary material
Source: publisher figshare collection journal article supplement (https://brill.figshare.com/ndownloader/files/28453203)
Supplement: Supplementary file 1 [file 28453203]

## Sheet: Supporting_Information_S1_final
Species	Maximum SVL (mm)	Family	Miniaturized_binary	Microhabitat_five_level	Microhabitat_two_level	Microhabitat_details	Aridity_four_level	Aridity_details	Distribution	Notes
Eremias andersoni	40	Lacertidae	1	Arboreal	Arboreal	Numerous in the lower areas between dunes, as well as on the sands with more developed grassy and subshrubby vegetation. Climb well on shrubs and may jump from one branch to another [Darevsky & Shcherbak, 1978].	Arid	Specimens collected on one of the isolated areas of semianchored sands situated in the stony desert of Descht-i-Kevir [Darevsky & Shcherbak, 1978].	Holotype collected 40-45 km east of Darja-i-Nimek lake [Darevsky & Shcherbak, 1978].	NA
Eremias arguta	100	Lacertidae	0	Surface-dwelling	Terrestrial	A diurnal lizard that appears on the surface in morning when the ground becomes warmer [Arakelyan, 2011]. Considered a terrestrial substrate generalist for studies on locomotor performance [Bergmann et al., 2017].	Semi-arid	Inhabits the mountain piedmonts and low foothills, preferring the plains. Steppe-adapted xerophilous, with sclerophilic and partially petrophilic specialization [Dujsebayeva et al., 2019].	Found in the Black Sea region from Romania to Ciscaucasia, Eastern Transcaucasia and Middle Asia to the east as far as Chinese Dzhungaria and Dzhungar Gobi in Western Mongolia [Poyarkov et al., 2014].	NA
Ophisops elbaensis	35	Lacertidae	1	Rupicolous	Terrestrial	Found on ﻿rocky slopes of the hills [Milto et al., 2019].	Arid	﻿Eastern Desert subendemic [Milto et al., 2019]. Inhabits the southern and most humid part of South Eastern Desert, and a more extreme hyperarid climate in the Central Eastern Desert; the Sartout Valley is characterized by relatively well-developed Acacia tortillis associations an proximity to a permanent source of water [Milto et al., 2018].	Locality records from Wadi Sartout in ﻿Wadi El Gemal National Park; Eastern Desert and Central Eastern Desert [Milto et al., 2018].	NA
Acanthodactylus grandis	103	Lacertidae	0	Surface-dwelling	Terrestrial	Considered a ground-dwelling species living in open areas [Damme & Vanhooydonck, 2002]; inhabits stony areas on fairly hard substrate [Disi, 2011]; nhabits hard substrates with scattered vegetation [Al-Sadoon et al., 2017].	Arid	Endemic to the Badia or "Syrian Desert" ecozone [Disi, 2011].	Found in Badia [Disi, 2011], Badanah and Sakaka [Al-Shammari, 2012] and the Turaif region of Saudi Arabia [Al-Sadoon et al., 2016].	NA
Amapasaurus tetradactylus	30	Gymnophthalmidae	1	Surface-dwelling	Terrestrial	Litter-dwelling lizard [Pellegrino et al., 2018]. All specimens collected in the leaf litter [Avila-Pires et al., 2013].	Humid	Collected in well-drained ('terra firme') primary rainforests [Avila-Pires et al., 2013].	Paratypes collected in the upper Maracá river basin, Amapá, Brazil; likely ﻿endemic to the eastern part of the Guiana Shield [Pellegrino et al., 2018].	NA
Neusticurus tatei	104	Gymnophthalmidae	0	Semi-aquatic	Terrestrial	It is a highly aquatic species, active only by day, escaping by swimming or diving as soon as they are approached; three adults observed resting in a crevice at night in the spray zone of a cascade [Barrios-Amoros & Brewer-Carias, 2008].	Humid	Elevation of specimen coordinates on Sarisariñama-tepui coincide with evergreen montane forests [Barrios-Amoros & Brewer-Carias, 2008].	Known from a few specimens collected in Cerro Duida, Amazonas, Venezuela; also found in Sarisariñama, at Canaracuni creek, and at the base and slopes of the mountain (400-1100 m) [Barrios-Amoros & Brewer-Carias, 2008].	NA
Cercosaura hypnoides	36.8	Gymnophthalmidae	1	Fossorial	Terrestrial	Holotype was collected by day beneath a rotting log on a steep treeless slope with a southeastern exposure. There was heavy moss growth all around [Doan & Lamar, 2012].	Humid	Habitat is premontane pluvial forest, receiving over 4000 mm annual rainfall, and there is steep, rugged terrain with numerous rocky streams, and relatively tall undisturbed forest [Doan & Lamar, 2012].	Known only from the type locality on the Vereda Portachuelo, a ridge of the Cordillera Oriental of the Andes Mountains at 1560–1800 m elevation [Doan & Lamar, 2012].	NA
Anadia pulchella	105.9	Gymnophthalmidae	0	Arboreal	Arboreal	Type specimen collected in a bromeliad [Ruthven, 1926]; congeners also collected on trees and leaves, and their long prehensile tail and morphology is suggestive of arboreal habits [Rivas et al., 2012].	Humid	Holotype collected in the mountains at an elevation of 7,000 feet; coincident with Sub-Andean cloud forests [Ruthven, 1926].	Found in the Santa Marta Mountains, Colombia [Ruthven, 1926; Rivas et al., 2012].	NA
Procellosaurinus tetradactylus	27.5	Gymnophthalmidae	1	Fossorial	Terrestrial	Considered a fossorial species [Ramiro et al., 2017]. Traverses over substrates such as gravel, leaf litter and sand [Renous et al., 2008].	Arid	Occurs solely in semi-arid Quaternary dunes [Renous et al., 2008].	Endemic to the Brazilian Caatinga [Renous et al., 2008].	NA
Heterodactylus imbricatus	110	Gymnophthalmidae	0	Fossorial	Terrestrial	A fossorial, limb-reduced, and earless lizard with a very elongate body and tail [Rodrigues et al., 2009].	Humid	Specimens collected in a riparian forest associated with Cerrado biome [Novelli et al., 2011].	Occurs in the Atlantic Forest of southern Brazil [Rodrigues et al., 2009].	NA
Xantusia sherbrookei	36	Xantusiidae	1	Surface-dwelling	Terrestrial	Lives in the decaying branches and trunks of the Datilillos and Cardons (Pachycereus pringlei) [Bezy et al., 2019]. Most Xantusia are not subterranean nor fossorial [Meiri, 2011].	Semi-arid	Occurs in Magdalena Plains, less than 300 m in elevation [Bezy et al., 2019].	Collected from the northern plains in the region of La Poza Grande, Baja California, Mexico [Bezy et al., 2019].	NA
Xantusia riversiana	117	Xantusiidae	0	Surface-dwelling	Terrestrial	Occurs most commonly in habitats providing dense cover within thickets; ground-dwelling; also found under stones and pieces of wood [Fellers & Drost, 1991].	Semi-arid	Found most commonly in boxthorn, prickly pear, and rocky habitats [Fellers & Drost, 1991]; also a variety of habitats, e.g. maritime desert scrub, grassland, chaparral, oak savanna, cactus, dry streambeds, cliffs, rocky beaches, sparsely-vegetated areas [Nafis, 2020].	Endemic to the Channel Islands off the coast of southern California; occur on Santa Barbara, San Nicolas and San Clemente Islands and one small islet (Sutil Island) [Fellers & Drost, 1991].	NA
Lepidophyma lineri	37	Xantusiidae	1	Fossorial	Terrestrial	Found around buttresses of large trees, and in logs, dark crevices, and road culvert [Mautz & Lopez-Forment, 1978].	Mesic	Coordinates of holotype [Palacios-Aguilar et al., 2018] coincides with the border between shrub habitat, tropical decidiuous and coniferous forests [Urbazaev et al. 2018].	Holotype collected 2 km from San Gabriel Mixtepec, Oaxaca, Mexico [Palacios-Aguilar et al., 2018].	NA
Lepidophyma reticulatum	103	Xantusiidae	0	Fossorial	Terrestrial	Terrestrial to semifossorial, found in leaf litter, especially between tree buttresses [McDiarmid & Savage, 2005]. Species of Lepidophyma (including L. flavimaculatum & L. reticulatum) have secretive habits, with a propensity to live under debris or in fallen logs in relatively undisturbed forests [Savage 2002; Goldberg & Bursey, 2011].	Humid	Occurs in lowland and premontane evergreen forests [McDiarmid & Savage, 2005].	Occurs in southwestern Costa Rica and probably adjacent southwestern Panama [Savage 2002; Goldberg & Bursey, 2011].	NA
Ablepharus grayanus	33	Scincidae	1	Surface-dwelling	Terrestrial	Specimens collected under dead palm leaves [Karamiani et al., 2015].	Humid	Fourteen specimens collected from palm groves [Karamiani et al., 2015].	Distributed in eastern and southeastern Iran, e.g. Kerman, Sistan, Baluchestan provinces [Karamiani et al., 2015].	NA
Lygosoma lanceolatum	100	Scincidae	0	Fossorial	Terrestrial	A rare burrowing skink [Jacobsen et al., 2010].	Arid	Recorded from dune thickets [Jacobsen et al., 2010].	Holotype described from the Bazaruto Archipelago [Broadley, 1990]; collected on the northern end of San Sebastian Peninsula, Mozambique [Jacobsen et al., 2010]; endemic to Magaruque and Benguera [Parker, 2001].	NA
Panaspis tancredi	25	Scincidae	1	Surface-dwelling	Terrestrial	Diurnal and terrestrial, and feeds primarily on insects and their larvae [Jackson & Blackburn, 2010].	Semi-arid	Most individuals collected from grassy savanna but present on eucalyptus plantation, secondary forest, and wetlands [Jackson & Blackburn, 2010].	Known from a handful of reports from regions as distant as Ethiopia, southern Democratic Republic of Congo [Jackson & Blackburn, 2010].	NA
Oligosoma whitakeri	101	Scincidae	0	Rupicolous	Terrestrial	Most common amongst stones and where there was little subsurface Muehlenbeckia; occupies areas with rocks, crevices and seabird burrows under scrub and forest [Towns & Elliot, 1996]. Use warm moist environments, such as seabird burrows and deep boulder banks, as daytime retreats, and they forage on warm nights when relative humidity is near saturation [Towns, 1994]. Twenty-three individuals colle…	Mesic	Inhabits coastal forests and scrub [Gill & Whitaker, 2001; Chapple et al., 2008].	Currently has a disjunct distribution with northeastern island populations and populations in the lower North Island in the Wellington region; likely once were continuously distributed across the North Island mainland, New Zealand [Chapple et al., 2008].	NA
Menetia maini	28	Scincidae	1	Surface-dwelling	Terrestrial	Specimens collected in the leaf litter [Rankin, 1979].	Humid	Inhabits tropical woodland on stony lateritic soil in undulating country [Rankin, 1979].	Distributed in the Northern Territory, mainly across the northern parts, south to Daly Waters and the McArthur River drainage, with probable isolated populations at Peko and Mt. Doreen. It also occurs on Centre Island, extralimitally in the Kimberley region of W.A., and in Queensland as far east as Normanton [Rankin, 1979].	NA
Emoia longicauda	100	Scincidae	0	Arboreal	Arboreal	Among four Emoia species mentioned (including E. longicauda), all are arboreal or semiarboreal, being found on shrubs or trees. Emoia longicauda may occupy higher locations in the trees, on average, than do the other species [Kraus, 2018].	Humid	Strongly associated with rainforests [Couper et al., 1993].	Occupies New Guinea, a few immediately adjacent islands, and Cape York, Australia [Kraus, 2018]. Specimens collected from Aru, Selaru, and Kai islands [How et al., 1998].	NA
Pygmaeascincus koshlandae	28	Scincidae	1	Surface-dwelling	Terrestrial	A small, ground-dwelling skink [Greer, 1991].	Mesic	Two specimens found in a recently burned area, one of which was under a small stone below a limestone outcrop. The surrounding unburned area was woodland with high grass cover. Menetia (genus) occur in arid, semi-arid, and seasonally dry habitats in Australia [Greer, 1991].	Known only from two localities in the southeastern part of Cape York Peninsula, north of Palmer River [Greer, 1991].	NA
Lioscincus nigrofasciolatum	112	Scincidae	0	Arboreal	Arboreal	An arboreal skink, very common in New Caledonia [Thibault et al., 2017; Villard et al., 2019].	Mesic	Inhabits forest, forested shrubland, and maquis shrubland environments [Thibault et al., 2017]. Also found in rainforest [Duron et al., 2019].	Endemic to New Caledonia [Thibault et al., 2017].	NA
Nannoscincus manautei	34	Scincidae	1	Fossorial	Terrestrial	Nannoscincus (genus) is a group of diminutive, elongate, small-limbed, and burrowing species. Holotype and paratype of Nannoscincus manautei collected under logs and rocks embedded in a deep humus layer and overlain by thick leaf litter [Sadlier et al., 2004].	Humid	Holotype and paratype collected in a patch of moist closed forest characterized by emergent Araucaria [Sadlier et al., 2004].	﻿Known only from a single site above 700 m on the Massif de Kopéto, New Caledonia [Sadlier et al., 2004].	NA
Eugongylus mentovarius	117	Scincidae	0	Rupicolous	Terrestrial	Typically not seen until they were flushed by the close approach of an observer, whereupon they fled hastily to the nearest limestone crevice or hole. They foraged inconspicuously in leaf litter during the day and were captured only in sticky traps [Ineich, 2009].	Semi-arid	Only present in limestone forest and are uncommon [Wiles & Conry, 1990; Ineich, 2009].	Observed on Ngerukewid islands; broader distribution uncertain [Wiles & Conry, 1990].	NA
Proablepharus tenuis	32	Scincidae	1	Fossorial	Terrestrial	Fossorial to terrestrial, utilising logs, grass cover, litter to shelter and feed [Price et al., 2010].	Mesic	Inhabits open forests and woodlands across northern Australia, often with spinifex or speargrass [Wilson & Swan, 2017].	Far north of Western Australia, south to Broome and Lake Argyle. Extralimital in far north of Northern Territory and northern Queensland [Storr, 1975].	NA
Tropidoscincus aubrianus	120	Scincidae	0	Surface-dwelling	Terrestrial	The most distinctive member of the genus, which comprises of three species that are large, terrestrial skinks with long limbs and tails [Smith et al., 2007; Shea et al., 2009].	Mesic	Inhabits open woodland of lowland hills on the west coast, and edge of coastal vine thicket at Houailou on the east coast [Sadlier, 1986].	Endemic to mainland New Caledonia [Bauer & Sadlier, 1993].	NA
Madascincus nanus	29	Scincidae	1	Fossorial	Terrestrial	Considered part of the fossorial Malagasy Scincinae [Schmitz et al., 2005]; collected in pit-fall traps; never encountered in opportunistic searching, probably because of its small size and possible cryptozoic habits [Andreone & Greer, 2002].	Humid	Occurs in rainforests and transitional forests [Miralles et al., 2016]; only known from northeast Madagascar; ﻿Anjanaharibe-Sud, Tsararano and Masoala [Andreone & Greer, 2002].	Restricted to the northern half of Madagascar [Miralles et al., 2016].	NA
Madascincus stumpffi	102	Scincidae	0	Fossorial	Terrestrial	Designated as fossorial; collected from pit-fall traps [D'Cruze et al., 2007].	Humid	Sampled from rainforest sites, 130-185m elevation [Andreone et al., 2009]; disturbed canopy forest [Blumgart et al. 2017].	Has been collected in the Antsahamanara forest of the Tsaratanana Massif [Andreone et al., 2009] as well as the island of Nosy Komba [Blumgart et al. 2017].	NA
Amphiglossus andranovahensis	38	Scincidae	1	Fossorial	Terrestrial	All Amphiglossus burrow to a large degree, typically in leaf litter, sand soil, or rotten wood; terrestrial [Raxworthy & Nussbaum, 1993].	Mesic	Found in spiny forests, characterized by a dense xerophytic assemblage of succulent and spinescent plants (e.g. Didiereaceae, coralliform euphorbias, and baobabs), reaching a maximum height of 8 meters [D'Cruze & Sabel, 2005].	Occurs in the Ranobe Area of southwest Madagascar [d'Cruze & Sabel, 2005].	NA
Amphiglossus tanysoma	103	Scincidae	0	Fossorial	Terrestrial	Holotype captured in a pitfall trap overnight; paratype captured inactive during the day under rotten wood in a cacao plantation; presumably fossorial to a certain degree [Andreone & Greer, 2002].	Mesic	Occurs in a sub-humid climate, transitional between the Sambirano humid area and a dry west area; habitat dominated by dry forests [Andreone & Greer, 2002].	Only found on the Sahamalaza Peninsula, Malaysia; collected within Berara and Anabohazo forests [Andreone & Greer, 2002].	NA
Ristella beddomii	40	Scincidae	1	Surface-dwelling	Terrestrial	Inhabits leaf litter [Easa, 1998].	Humid	Niche designated as stream, residing in rainforests of multi-storied structure [Ganesh, 2007].	Occurs in the rainforests of Karnataka, India, within the biodiversity hotspot of Western Ghats [Ganesh, 2007].	NA
Alinea berengerae	100.2	Scincidae	0	Arboreal	Arboreal	Mainly an arboreal species; no specimens were found on the ground, but when disturbed they will throw themselves to the ground to escape [Caicedo-Portilla, 2014].	Humid	The island on which this species occurs has elements of both tropical dry forest and tropical humid forest; A. beregerae is found in cultivated areas, abandoned buildings, forest edges, within the same secondary forest in regeneration, on rotten logs by the roadside, and on coconut palm trunks surrounded by vegetation [Caicedo-Portilla, 2014]. Suggested to occur in primary forest [Miralles, 2006].	Endemic to the San Andrés island, Colombia [Caicedo-Portilla, 2014].	Current nomenclature: Marisora berengerae
Scincella macrotis	24	Scincidae	1	Surface-dwelling	Terrestrial	Referred to as large-eared ground skink, so presumably terrestrial [Rangsamy et al., 2018].	Humid	Endemic to Great Nicobar island [Harikrishnan & Vasudevan, 2018], which is predominantly covered in evergreen forest [Roy et al., 2005].	Known only from specimens collected in Great Nicobar island [Harikrishnan & Vasudevan, 2018].	NA
Sphenomorphus indicus	104.7	Scincidae	0	Surface-dwelling	Terrestrial	One of five skink species observed foraging in the leaf litter and basking in the sunflecks besides the road [Islam & Saikia, 2013]. A terrestrial skink found at night under rocks on the ground, in crevices of cliffs, or between roots, but never on trees [Ota, 1987]. A leaf litter skink captured in high numbers through pitfall traps [Sung et al., 2011]. A diurnal and heliophilus skink observed al…	Mesic	Collected in subtropical secondary forests and plantations in South China [Sung et al., 2012]. Restricted to forested regions where ambient temperatures are rarely higher than 30 °C [Ji et al., 2006]. Found in tropical semi-deciduous and tropical broad-leaved forests [Chettri et al., 2011].	Occurs throughout a large part of South-East Asia, from eastern India and southern China to southern Thailand (perhaps northern Malaysia),Myanmar, Laos, Cambodia and Vietnam [Teynié, 2004].	NA
Tropidophorus micropus	40	Scincidae	1	Semi-aquatic	Terrestrial	Collected from narrow crevices of rocky banks of small streams at the headwaters [Pui & Das, 2017].	Humid	Collected in tropical rainforests [Lloyd et al., 1968; Pui et al, 2017]	Distributed in Long Bloe, upper Sungei Mahakkam, Kalimantan, Indonesia and Putai, Sarawak, Malaysia [Pui et al, 2017]. Also recorded in Borneo [Lloyd et al., 1968].	NA
Tropidophorus cocincinensis	101	Scincidae	0	Semi-aquatic	Terrestrial	Observed peeking out of a crevice in a wet rock face close to a narrow rocky stream [Hartmann et al., 2009]. Nineteen specimens collected at night along flowing streams [Stuart et al., 2010].	Humid	Found in hill evergreen forests of northeastern Cambodia [Stuart et al., 2010].	Occurs in Ta Veng, Cambodia [Stuart et al., 2010], Phnom Kulen, Siem Reap, Cambodia [Hartmann et al., 2009], in central Vietnam from Quang Binh to Kon Tum [Nguyen et al., 2010] and southern Laos in Champasak and Xe Kong [Chuaynkern et al., 2005].	NA
Calyptotis thorntonensis	35	Scincidae	1	Fossorial	Terrestrial	Affinity to moisture, shelters beneath logs, rocks, and leaf litter [Wilson & Swan, 2017].	Humid	Occurs in closed forests of the Wet Tropics [Williams, 2006]; high altitude rainforests [Wilson & Swan, 2017].	Distributed between Thornton Peak and Upper Roaring Meg in the Wet Tropics [Wilson & Swan, 2017].	NA
Ctenotus saxatilis	100	Scincidae	0	Rupicolous	Terrestrial	Primarily inhabits rocky slopes [Woinarski & Gambold, 1992]. Also collected in termite mounds [Moro & Cullen, 2013].	Arid	Distributed predominantly in arid zones, but overlapping into semi-arid regions [James & Shine, 2000].	Widespread in central and western Australia [Wilson & Swan, 2017].	NA
Parvoscincus tagapayo	32.1	Scincidae	1	Fossorial	Terrestrial	Semifossorial; collected under leaf litter, small stones, and debris on the forest floor [Brown et al., 1999].	Humid	Found in primary tropical moist closed-canopy rain forest; the habitat at the collection site was at the transition between mixed dipterocarp and upper montane mossy forest [Brown et al., 1999].	Only known from southern Sierra Madres of southeastern Luzon [Brown et al., 1999].	NA
Pinoyscincus jagori	110.3	Scincidae	0	Surface-dwelling	Terrestrial	Observed on the forest floor, most basking on sunspots [Binaday et al., 2017]. This species can often be seen basking in the sun during the day and shelters on the ground amidst the leaf litter, rotting logs, or in tree holes [Solania et al., 2020]. Also reported in the subcanopy, though the authors suggest its arboreal habits need to be verified [Gonzalez et al., 2020].	Humid	Inhabits secondary dipterocarp and submontane forests; also found at cave entrances in within those habitats [Nuñeza & Galorio, 2015]. Found in lowland evergreen forests [Gonzalez et al., 2020].	Endemic to Phillipines; distributed in the Luzon and Mindanao Pleistocene Aggregate Island Complexes (PAICs) [Binaday et al., 2017].	NA
Tribolonotus blanchardi	40	Scincidae	1	Semi-aquatic	Terrestrial	Lives in very moist conditions, under stones and piles of dead leaves and other debris in wet stream beds. Forages in and over debris at the sides of streams [McCoy, 2015].	Humid	Found in river valleys and montane forests [McCoy, 2015].	Found in Nggela and Bougainville, Solomon Islands [McCoy, 2015].	NA
Tribolonotus gracilis	103	Scincidae	0	Surface-dwelling	Terrestrial	A terrestrial lizard [Houssaye et al., 2010; Kwon et al., 2019]; collected from large piles of coconut husks in a copra plantation [Cogger, 1972].	Humid	Inhabits tropical rainforests [Kwon et al., 2019].	Endemic to northern New Guinea [Austin et al., 2010].	NA
Afroedura pongola	40	Gekkonidae	1	Rupicolous	Terrestrial	Retreats into narrow crevices between rocks and under exfoliating flakes of granite [Jacobsen et al., 2014].	Semi-arid	Found in Granite Lowveld and Northern Zululand Sourveld (savanna biome) at elevations of 750–850 m asl [Jacobsen et al., 2014; Jewitt, 2018].	Known only from north of the Pongola River in the far northeast of Kwazulu-Natal [Jacobsen et al., 2014].	NA
Blaeseodactylus sakalava	104	Gekkonidae	0	Arboreal	Arboreal	A commensal, arboreal gecko [Rosler, 1984]. Observed low on tree trunks and rocky outcrops [Ineich et al., 2016].	Mesic	Dense savannah woodland is the favored habitat [Rosler, 1984].	Found in western and southwestern Madagascar [Rosler, 1984].	NA
Luperosaurus yasumai	38.9	Gekkonidae	1	Surface-dwelling	Terrestrial	Holotype collected along a path; on the ground and remained motionless when located [Ota et al., 1996].	Humid	Holotype collected along regenerating forest, chiefly consisting of Dipterocarpaceae [Ota et al., 1996].	Holotype collected in Jalan Ibu-1, Bukit Soeharto Experi- mental Forest, approximately 45 km southwest of Samarinda, Kalimantan, Indonesia [Ota et al., 1996].	NA
Luperosaurus kubli	105.4	Gekkonidae	0	Arboreal	Arboreal	Holotype was first observed gliding/parachuting from the canopy (estimated 8-15m high) where it landed at 1.5m above the ground on the trunk of a large tree [Brown et al., 2007].	Humid	Holotype collected form the forests of northern Sierra Madre Mountain Range of Luzon Island; a secretive forest species [Brown et al., 2007.	Holotype collected in the Sierra Madre Mountain Range of northern Luzon Island, Philippines [Brown et al., 2007].	NA
Cnemaspis podihuna	26.6	Gekkonidae	1	Arboreal	Arboreal	Essentially arboreal and generally frequents the boles of trees with buttress roots. When alarmed, the geckos took refuge among Ficus roots [Manamendra-Arachchi et al., 2007]. They mainly live on large trunks either live or dead, but often this gecko is found on live trees with hard bark and cracks on the trunk. On most occasions, they can be observed at a height of about 15 m from ground level, …	Mesic	Found in intermediate-zone forests, dry mixed evergreen forests, lowland intermediate semi-evergreen forests [Karunarathna et al., 2010].	Endemic to Sri Lanka [Manamendra-Arachchi et al., 2007]; observed in Kaalkanna, Geelone Mountain Forest, Nilgala Forest Reserve, Malayadikanda Forest, and Buddhangala Forest [Karunarathna et al., 2010].	NA
Cyrtodactylus fraenatus	100	Gekkonidae	0	Arboreal	Arboreal	Collected from tree trunks (2 to 9 m above ground) and rock outcrops in shaded areas; one specimen found on the wooden wall of a small house [Batuwita & Bahir, 2005]. Found in houses, caves, large trees, and wall crevices [Wickramasinghe & Somaweera, 2002].	Humid	Type specimens collected in the hills around Kandy, in Gannoruwa Forest [Batuwita & Bahir, 2005]; occupies forested regions of Sinharaja World Heritage site, more abundant in the wet than dry zone [Wickramasinghe & Somaweera, 2002].	Endemic to Sri Lanka [Batuwita & Bahir, 2005; Wickramasinghe & Somaweera, 2002].	NA
Stenodactylus mauritanicus	29	Gekkonidae	1	Surface-dwelling	Terrestrial	Inhabits flat rock-strewn sand and gravel plains with fairly good vegetation cover [Metallinou et al., 2012].	Arid	Restricted to coastal semi-desert under the influence of the Mediterranean [Metallinou et al., 2012].	Present in Egypt and has a wide, almost continuous distribution roughly along the northern margin of the Sahara desert [Metallinou et al., 2012].	NA
Ptychozoon trinotaterra	100	Gekkonidae	0	Arboreal	Arboreal	Found on trees in intact climax rain forest and slightly disturbed clearings or secondary forest adjacent to intact rainforest (Brown, 1999; Fitzsimons, 2017].	Humid	Primary habitat of this species is dry evergreen and lowland dipterocarp forest at elevations of up to 900 m a.s.l. [Das, 2010; Fitzsimons, 2017].	Holotype collected in Sakaerat, Nakhon, Ratchasima Province in northeastern Thailand; paratypes collected in Gia Lai and Yok Don provinces, central Vietnam; also collected in Cat Tien, Dong Nai Province in southern Vietnam [Brown, 1999; Kunya et al., 2011; Fitzsimons, 2017].	Current nomenclature: Gekko trinotaterra
Nactus sphaerodactylodes	26	Gekkonidae	1	Surface-dwelling	Terrestrial	Found under rocks, logs, or rotted banana stumps on either moist or dry soil and would scamper into adjacent leaf litter when disturbed [Kraus, 2005].	Humid	Specimens collected inland from the coast at elevations no greater than 40m and inhabited disturbed forest or gardens; seems absent from closed-canopy rainforest [Kraus, 2005].	Known from Sudest, Misima, and Woodlark islands, southeastern New Guinea. Likely to occur on the smaller Louisiades lying between Sudest and Misima [Kraus, 2005].	NA
Gehyra barea	105.2	Gekkonidae	0	Arboreal	Arboreal	Observed four metres high on the trunk of a large tree on southern Batanta Island, and another on a Pandanus tree on the northern edge of Salawati Island [Oliver et al., 2010].	Humid	Collected in moderately disturbed lowland rainforest [Oliver et al., 2010].	Type specimens collected from two tiny volcanic islands, Teon and Serua in the southern Banda Sea approximately halfway between Timor and Tanimbar, Maluku Province, Indonesia; also collected from Batanta and Salawati Islands in the Raja Ampat Archipelago, just west of mainland New Guinea [Oliver et al., 2010].	NA
Narudasia festiva	31	Gekkonidae	1	Rupicolous	Terrestrial	Strictly rupicolous [Branch et al,. 1997].	Semi-arid	Occupies rocky substrate, absent from dunes and gravel plains, but approaches desert [Daza et al., 2012].	Ranges across much of southern and central Namibia, from Hunsberg in the south to Okahandja in the north [Daza et al., 2012].	NA
Uroplatus sikorae	115.7	Gekkonidae	0	Arboreal	Arboreal	Among all 14 species of Uroplatus examined (including U. sikorae), all are thought to be arboreal and only active at night [Pearson et al., 2007].	Humid	Among all 14 species of Uroplatus examined, all appear to be restricted to primary forests [Pearson et al., 2007].	Endemic to Madagascar; occupies areas bisected by much smaller rivers and is confined to single watershed areas of endemism [Raxworthy et al., 2008].	NA
Ebenavia maintimainty	24	Gekkonidae	1	Surface-dwelling	Terrestrial	Holotype collected under a dead, fallen, trunk of a legume tree; paratypes exposed on the surface of limestone [Nussbaum & Raxworthy, 1998].	Semi-arid	Holotype collected in lake shore forest; paratypes collected in xeric vegetation dominated by low baobabs and leguminous trees [Nussbaum & Raxworthy, 1998].	Likely endemic to the Mahafaly Plateau in southwestern Madagascar [Nussbaum & Raxworthy, 1998].	NA
Paroedura masobe	107	Gekkonidae	0	Arboreal	Arboreal	Two individuals collected 1.5m and 0.3m high on branches [Rosa et al., 2011].	Humid	Collected in low elevation rainforest [Rosa et al., 2011].	Known only from low elevation sites in the type locality of Zahamena, Madagascar [Rosa et al., 2011].	NA
Cryptactites peringueyi	28.3	Gekkonidae	1	Semi-aquatic	Terrestrial	Usually within 100 m of the coast line in areas of urban development, along the river bank of the tidal reaches of the Kromme River [Bates et al., 2014].	Humid	Restricted to salt marshes and adjacent habitats, also further inland in association with dune swales [Bates et al., 2014].	Extent of occurrence is 785 square km in the Eastern Cape Province, South Africa [Bates et al., 2014]	NA
Christinus guentheri	102	Gekkonidae	0	Arboreal	Arboreal	Terrestrial and arboreal, sheltering by day under rocks and woody debris [Wilson & Swan, 2017].	Semi-arid	Occurs on rocky islets characterized by grassy rock slopes and stunted shrubs and trees [Colgan et al., 2006].	Recorded from Phillip Island and Nepean Island, both lying to the south of the main island, and from three small rocky islets – Moo’oo Stone, Green Pool Stone and Bird Island - all lying within 100 metres or so of the northern coast of the main island [Colgan et al. 2006].	NA
Goggia gemmula	30	Gekkonidae	1	Rupicolous	Terrestrial	A rupicolous species, especially common where appropriate rocky retreats are found [Bauer & Branch, 2001].	Arid	Occurs in the desert biome [Snyman-Van der Walt et al., 2020].	Regional endemic to Richtersveld National Park, Republic of South Africa [Bauer & Branch, 2001].	NA
Chondrodactylus bibronii	100	Gekkonidae	0	Rupicolous	Terrestrial	A nocturnal rock-dwelling gekkonid that regularly forms aggregations in crevices [Meyer & Mouton, 2007].	Arid	Occupies karoid and semi-desert habitats [Branch, 1998; Meyer & Mouton, 2007].	A widespread gecko in South Africa [Slogett, 2018]; though limited to temperate regions [Bauer & Lamb, 2005].	NA
Hemidactylus pumilio	26.5	Gekkonidae	1	Surface-dwelling	Terrestrial	Nocturnal, strictly ground-dwelling; moves and hides among little stones [Gómez-Díaz et al., 2012]. A nocturnal, ground dwelling gecko observed active on the soil or inactive under stones; mostly observed under scattered stones in flat habitats with hardened soils, usually in less rocky habitats than those preferred by Hemidactylus homoeolepis, although often the species are encountered in syntop…	Semi-arid	Prefers flat habitats with hardened soils, usually less rocky than for H. homeolepis (Razzetti et al., 2011]. Specimen coordinates correspond with croton shrubland, herb communities, montane and sub-montane shrubs, and succulent shrubland [Gangoso et al. 2013].	Endemic to Socotra Island [Razzetti et al., 2011].	NA
Hemidactylus graniticolus	110.6	Gekkonidae	0	Rupicolous	Terrestrial	Strictly rupicolous, recorded only from boulders [Agarwal et al., 2011].	Semi-arid	The boulder habitats of this species are both in hills and rocky outcrops in the plains. These areas are characterized by sparse scrub vegetation and few trees or occasionally deciduous forests [Agarwal et al., 2011].	Known from voucher specimens collceted in Karnataka, India, and has also been observed in Andhra Pradesh and Tamil Nadu [Agarwal et al., 2011].	NA
Lygodactylus insularis	26	Gekkonidae	1	Arboreal	Arboreal	Observations were made on trees, shrubs (frequently on the native Heliotropium foertherianum), sand, ground, and occasionally on the walls of the military camp. [Sanchez et al., 2019]	Semi-arid	This tiny arboreal day gecko inhabits preserved coastal shrubs and inland shrub/tree habitats, but also inhabits disturbed shrubs and trees in former phosphate mining areas [Sanchez et al., 2019].	Endemic to Juan de Nova, an island in between Madagascar and the African continent [Sanchez et al., 2019].	NA
Phelsuma kochi	115	Gekkonidae	0	Arboreal	Arboreal	The gecko selected relatively high and thick trees as perching sites in the daytime; a sit-and-wait forager [Ikeuchi et al., 2005]; a relatively large arboreal gecko that often perches on tree trunks and branches to ambush small arthropods [Ito et al., 2013].	Mesic	Found in tropical dry forests of Madagascar [Ikeuchi et al., 2005].	Distributed over the northwestern and western coasts of Madagascar [Glaw & Vences, 2007; Ito et al., 2013].	NA
Garthia penai	33.2	Phyllodactylidae	1	Rupicolous	Terrestrial	Found on the ground under stones and also on walls near human habitations; inhabits rocky substrates [Demangel, 2016].	Semi-arid	Habitat characterized rocky terrain covered by shrub vegetation, cacti, and lichens, and litter or soil underneath. It is also associated with bodies of water such as lagoons and dams [Demangel, 2016].	Endemic to central Chile, in the foothills of the Region of Coquimbo, between 500 and 2,400 meters above sea level [Demangel, 2016].	NA
Phyllodactylus tuberculosus	100	Phyllodactylidae	0	Rupicolous	Terrestrial	Habitat includes caves, crevices between boulders and cliffs, beneath surface debris; mainly climbing locomotion [Zaaf & van Damme, 2001]. Collected beneath concrete road bridges along the highway [Hoddenbach & Lannom, 1967].	Mesic	Commonly encountered throughout tropical dry forest habitat; almost exclusively occupies xeric habitat [Dixon, 1960].	Ranges from southern Sonora, Mexico to northern Costa Rica [Blair et al., 2013].	NA
Asaccus gallagheri	40	Phyllodactylidae	1	Rupicolous	Terrestrial	Found along stony substrates [SimÓ-Riudalbas et al., 2018].	Semi-arid	Occurs in wadis and on small cliffs and boulders on open hillsides [SimÓ-Riudalbas et al., 2018].	Distributed across the Hajar Mountains, from sea level up to 1,900m in the Jebel Akhdar [SimÓ-Riudalbas et al., 2018].	NA
Haemodracon riebeckii	140	Phyllodactylidae	0	Rupicolous	Terrestrial	Occupies vertical surfaces such as cliffs/rocks and tree trunks, less frequently on horizontal surfaces such as the ground and shrub branches; rupicolous [Tamar et al., 2019].	Semi-arid	Specimen coordinates [Tamar et al., 2019] correspond to croton shrubland, semi-evergreen woodland, montane and sub-montane shrubs [Gangoso et al. 2013].	Distributed on Socotra and Samha Islands [Tamar et al., 2019].	NA
Sphaerodactylus ariasae	17.9	Sphaerodactylidae	1	Surface-dwelling	Terrestrial	Specimens collected in leaf litter over limestone substratum [Hedges & Thomas, 2000].	Mesic	Collected in xeric woods [Hedges & Thomas, 2000].	Known only from Isla Beata and the adjacent southernmost tip (Cabo Beata) of the Barahona Peninsula, Dominican Republic, completely within Jaragua National Park [Hedges & Thomas, 2000].	NA
Aristelliger georgeensis	115	Sphaerodactylidae	0	Arboreal	Arboreal	An arboreal species, known to vocalize at night [Dunn & Saxe, 1950; Bauer & Russell, 1993]. Twenty individuals found gathering amongst coral rubble along Roncador Cay, presumed to be the result of a natural dispersal event [López-Victoria & Daza, 2015].	Semi-arid	The species occurs in xeric to mesic conditions in association with trees or artificial cover [Bauer & Russell, 1993].	Occurs in Central America (e.g. Belize, Nicaragua, Mexico) and satellite islands [Bauer & Russell 1993; Díaz & Hedges, 2009].	NA
Strophurus horneri	35.7	Diplodactylidae	1	Arboreal	Arboreal	A spinifex-dwelling phasmid gecko [Oliver & Parkin, 2014].	Semi-arid	Found in well developed spinifex patches on or at the base of large sandstone escarpment or boulders [Oliver & Parkin, 2014].	Only known from the Arnhem Plateau region in the Top End of the Northern Territory [Oliver & Parkin 2014].	NA
Oedura gemmata	100	Diplodactylidae	0	Rupicolous	Terrestrial	Shelters in rock crevices and forages on exposed faces [Wilson & Swan, 2017].	Semi-arid	Only found along the Arnhem sandstone escarpments [Hoskin & Higgie, 2008; Wilson & Swan, 2017].	Endemic to the Arnhem Land, Northern Territory, Australia [Oliver et al., 2014; Wilson & Swan, 2017].	NA
Dierogekko poumensis	38.3	Diplodactylidae	1	Arboreal	Arboreal	Active on low (approximately 1m) maquis shrubs along the service track to the telecommunications tower on the north slope of Sommet Poum [Bauer et al., 2006].	Semi-arid	Abundant in maquis shrublands that immediately surround the forest remnants [Skipwith et al., 2014].	Known only from Sommet Poum (414 m maximum elevation), New Caledonia [Bauer et al., 2006].	NA
Correlophus cicilatus	130	Diplodactylidae	0	Arboreal	Arboreal	An arboreal, nocturnal species [Bauer & Sadlier, 2000; Ramirez et al., 2020].	Humid	Inhabit tropical forests [Bauer & Sadlier, 2000; Ramirez et al., 2020].	Endemic to southeastern New Caledonia [Bauer & Sadlier, 2000; Ramirez et al., 2020].	NA
Brookesia micra	19.9	Chamaeleonidae	1	Surface-dwelling	Terrestrial	Found through searching in the leaf litter and canopy-covered tsingy outcroppings during the day [Villenueve, 2017].	Mesic	Collected in dry deciduous forests and tsingy outcroppings [Villenueve, 2017].	Endemic to the islet of Nosy Hara in northern Madagascar [Villenueve, 2017].	NA
Furcifer minor	100	Chamaeleonidae	0	Arboreal	Arboreal	Occupies perches 1 to 5.5 meters high in three different habitats examined [Randrianantoandro et al., 2009].	Mesic	Found in tapia forest and agricultural land, but less often in humid forest [Randrianantoandro et al., 2009].	Appears to be restricted to the southern highlands of Madagascar, although there is a single, unusual record from Bélo-sur-mer on the west coast [Glaw & Vences, 2007; Randrianantoandro et al., 2009].	NA
Rhampholeon beraduccii	28	Chamaeleonidae	1	Arboreal	Arboreal	All animals were found alone, on low shrubs or herbs, within a few centimetres of the ground, in open land, in the immediate vicinity of the village [Mariaux & Tilbury, 2006].	Humid	Holotype and paratypes collected in fragmented forests of the Mahenge mountains [Mariaux & Tilbury, 2006; Menegon et al., 2011].	Only known from the vicinity of Sali in the Mahenge, an isolated massif separated from the Udzungwa range by the Kilombero valley [Mariaux & Tilbury, 2006].	NA
Trioceros wiedersheimi	100.5	Chamaeleonidae	0	Arboreal	Arboreal	Mean perch height of T. wiedersheimi wiedersheimi was 0.9 meters on Mount Oku, 1.15 meters on Koano and Mbulu Hills, and above 2 meters on Tchabal Mbabo and Mount Mbam (all considered within the 'herb layer'. Mean perch height of T. wiedersheimi perreti was 1.5 meters, observed at night on plant stems, fences around farms, and on bracken fern [Gonwouo et al., 2006].	Semi-arid	Inhabits montane savanna grassland [Gonwouo et al., 2006].	Occurs in the highlands of western Cameroon and eastern Nigeria [Gonwouo et al., 2006].	NA
Sitana schleichi	39.5	Agamidae	1	Arboreal	Arboreal	Members of the S. sivalensis group can be found on recently open patches near woodland borders; perches on low plants, feeds on the ground [Kästle, 1998].	Mesic	Subhumid monsoonal climate, woodland border biotope [Kästle, 1998].	Endemic to Nepal, holotype from Shuklaphanta National Park [Rawat et al., 2020].	Taxonomic ambiguity within S. sivalensis complex [Amarasinghe et al., 2015].
Salea anamallayana	111	Agamidae	0	Arboreal	Arboreal	An insectivorous arboreal lizard which remains active during the daytime (Das, 2002; Das et al., 2019].	Humid	A denizen of montane ‘shola’ forests and tea gardens of southern Western Ghats [Deepak & Vasudevan 2008]. The mountain chain where it occurs comprises wet evergreen forest [Das et al., 2019].	Endemic to the western Ghats, India [Das et al., 2019].	NA
Ceratophora karu	40	Agamidae	1	Surface-dwelling	Terrestrial	A fast-moving, purely ground dwelling lizard [Pethiyagoda & Manamendra-Arachchi, 1998].	Semi-arid	Natural vegetation in its range was submontane rain forest, replaced by tea, much of which has in turn been replaced by grassland, the primary habitat of C. karu [Pethiyagoda & Manamendra-Arachchi, 1998].	Known only from the Morningside ER., the nearby Thangamalai Plains and Gongala near Deniyaya; endemic to Sri Lanka [Pethiyagoda & Manamendra-Arachchi, 1998].	NA
Lyriocephalus scutatus	185	Agamidae	0	Arboreal	Arboreal	A diurnal, sub-arboreal, and slow-moving agamid [Karunarathna & Amarasinghe, 2013].	Humid	Distributed in cool and shady forested areas with a dense canopy in wet and intermediate lowlands and mid hills up to elevations of 1600m [Karunarathna & Amarasinghe, 2013].	Endemic to Sri Lanka [Karunarathna & Amarasinghe, 2013].	NA
Diporiphora convergens	34	Agamidae	1	Surface-dwelling	Terrestrial	Due to a similar morphology to other Diporiphora, likely to be largely terrestrial to scansorial [Shea, pers. comm.].	Mesic	Habitat of holotype is comprised of spinifex and tropical dry woodlands [Storr, 1974; Shea, pers. comm.].	Holotype collected at Crystal Creek, Western Australia [Storr, 1974].	NA
Pogona nullarbor	141	Agamidae	0	Arboreal	Arboreal	All members of the genus Pogona (including P. nullarbor) considered semi-arboreal; perching on limbs, stumps and fence posts [Wilson & Swan, 2017]	Semi-arid	Occurs in shrublands [Wilson & Swan, 2017]; prefers a shrubland habitat with minimal to moderate humidity [Rej & Joyner, 2018].	Restricted to the Nullarbor Plains [Wilson & Swan, 2017].	NA
Anolis cupeyalensis	33.5	Dactyloidae	1	Arboreal	Arboreal	Considered to be a grass-bush ecomorph [Losos, 2009]. Belongs to the alutaceus clade, which comprises of Cuban grass anoles that are small, elongate lizards with very long tails. When sympatric with Anolis alfaroi, perches closer to the ground [Garrido & Hedges, 1992].	Humid	Coordinates of specimens [Schettino et al., 2013] coincides with moist and pine forests [Galford et al., 2018].	Endemic to Cuba; most localities in the southeast of the country [Schettino et al., 2013]	NA
Anolis allisoni	100	Dactyloidae	0	Arboreal	Arboreal	Can be found in the upper trunks and crowns of trees in open habitats sympatric with Anolis sagrei and Aspidocelis maslini [Medina et al., 2016].	Humid	The only anole that occurs solely in mangrove forest habitats [Medina et al., 2016].	Endemic to the Caribbean islands [Medina et al., 2016].	NA
Anolis ophiolepis	39.8	Dactyloidae	1	Arboreal	Arboreal	A grass-bush anole, which arose from within a clade of Cuban trunk-ground anoles [Losos et al., 2006]; a grass-dwelling anole [Cádiz et al., 2013].	Semi-arid	Lives in open savannas, pastures, grazing fields, and in other open locations [Cádiz et al., 2013].	Occurs in Cuba; also found in smaller surrounding islands such as Isla de la Juventud (Schettino et al., 2010; Cádiz et al., 2013).	NA
Anolis capito	100	Dactyloidae	0	Surface-dwelling	Terrestrial	Found on or near the forest floor [Andrews, 1979; Corn, 1981]; primarily a shade-dwelling terrestrial species [Perez-Martinez et al., 2021], also perching low on tree trunks [Vitt and Zani, 2005].	Humid	Inhabits relatively undisturbed lowland moist and wet forests and premontane wet forest and rainforest [Savage, 2002].	Occupies a wide geographic range stretching from Tabasco, Mexico, to eastern Panama [Köhler et al., 2005].	NA
REFERENCES
Agarwal, I., Giri, V., Bauer, A.M. (2011). A new cryptic rock-dwelling Hemidactylus (Squamata: Gekkonidae) from south India. – Zootaxa 2765: 21-37.
Al-Sadoon, M.K., Paray, B.A., & Al-Otaibi, H.S. (2016). Survey of the reptilian fauna of the Kingdom of Saudi Arabia. V. The lizard fauna of Turaif region. – Saudi Journal of Biological Sciences 23(5): 642-648.
Al-Shammari, A.M. (2012). Additional records of lizards in Ha'il Province, Saudi Arabia. – Russian Journal of Herpetology 19(4): 287-291.
Amarasinghe, A.A.T., Ineich, I., Karunarathna, D.M.S.S., Botejue, W.M.S. & Campbell, P.D. (2015). Two new species of the genus Sitana Cuvier, 1829 (Reptilia: Agamidae) from Sri Lanka, including a taxonomic revision of the Indian Sitana species. – Zootaxa 3915(1): 67.
Andreone, F., & Greer, A.E. (2002). Malagasy scincid lizards: descriptions of nine new species, with notes on the morphology, reproduction and taxonomy of some previously described species (Reptilia, Squamata: Scincidae). – Journal of Zoology 258(2): 139-181.
Andreone, F., Glaw, F., Mattioli, F., Jesu, R., Schimmenti, G., Randrianirina, J.E. & Vences, M. (2009). The peculiar herpetofauna of some Tsaratanana rainforests and its affinities with Manongarivo and other massifs and forests of northern Madagascar. – Italian Journal of Zoology 76(1): 92-110.
Andrews, R.M. (1979). The lizard Corytophanes cristatus. An extreme "sit-and-wait" predator. – Biotropica 11(2): 136-139.
Arakelyan, M.S., Danielyan, F.D., Corti, C., Sindaco, R. & Leviton, A.E. (2011). The Herpetofauna of Armenia and Nagorno-Karabakh. – Society for the Study of Amphibians and Reptiles, Salt Lake City.
Austin, C.C., Rittmeyer, E.N., Richards, S.J., & Zug, G.R. (2010). Phylogeny, historical biogeography and body size evolution in Pacific Island Crocodile skinks Tribolonotus (Squamata; Scincidae). – Molecular Phylogenetics and Evolution 57(1): 227-236.
Avila-Pires, T.C.S., Lima, J.D., Hoogmoed, M.S., Lima, J.R.F. & da Rocha, W.A. (2013). Variation in Amapasaurus tetradactylus (Reptilia: Squamata: Gymnophthalmidae), a rare Guiana lizard. – Boletim do Museu Paraense Emílio Goeldi. Ciências naturais, Belém 8(3): 419-429.
Barrio-Amoros, C.L. & Brewer-Carias, C. (2008). Herpetological results of the 2002 expedition to Sarisariñama, a tepui in Venezuelan Guayana, with the description of five new species. – Zootaxa 1942(1): 1-68.
Bates, M.F., Branch, W.R., Bauer, A.M., Burger, M., Marais, J., Alexander, G.J. & de Villiers, M.S., eds. (2014). Atlas and Red List of the Reptiles of South Africa, Lesotho, and Swaziland. Suricata 1. – South African National Biodiversity Institute, Pretoria.
Batuwita, S. & Bahir, M.M. (2005). Description of five new species of Cyrtodactylus (Reptilia: Gekkonidae) from Sri Lanka. – The Raffles Bulletin of Zoology 12: 351-380.
Bauer, A.M. & Branch, W.R. (2001). The herpetofauna of the Richtersveld National Park and the adjacent northern Richtersveld, Northern Cape Province, Republic of South Africa. – Herpetological Natural History 8(2): 111-160.
Bauer, A.M., Jackman, T., Sadlier, R.A., & Whitaker, A.H. (2006). A revision of the Bavayia validiclavis group (Squamata: Gekkota: Diplodactylidae), a clade of New Caledonian geckos exhibiting microendemism. – Proceedings of the California Academy of Sciences 57(12-24): 503-547.
Bauer, A.M. & Lamb, T. (2005) Phylogenetic relationships of southern African geckos in the Pachydactylus group (Squamata: Gekkonidae). African Journal of Herpetology 54(2): 105-129.
Bauer, A.M., Russell, A.P. (1993). Aristelliger. – Catalogue of American Amphibians and Reptiles 565: 1-4.
Bauer, A.M., & Sadlier, R.A. (1993). Systematics, Biogeography and Conservation of the Lizards of New Caledonia. – Biodiversity Letters 1(3/4): 107.
Bauer, A.M., & Sadlier, R.A. (2000). In K. Adler & T. D. Perry (Eds.), The herpetofauna of New Caledonia. Ithaca, NY: Society for the Study of Amphibians and Reptiles.
Bergmann, P.J., Pettinelli, K.J., Crockett, M.E. & Schaper, E.G. (2017). It’s just sand between the toes: how particle size and shape variation affect running performance and kinematics in a generalist lizard. – The Journal of Experimental Biology 220(20): 3706-3716.
Bezy, R.L., Bezy, K.B., Bolles, K. & Sherbrooke, W.C. (2019). Night lizards (Xantusia) and their discoverers on the Baja California Peninsula. – Sonoran Herpetologist 32(2): 25-33.
Binaday, J.W.B., Amarga, A.K.A., Barrameda, E.S. & Bonagua, B.J.M. (2017). Amphibians and Reptiles in the Vicinity of Bulusan Lake, Bulusan Volcano Natural Park, Sorsogon, Philippines. – Philippine Journal of Science 146(3): 339-351.
Blair, C., Jiménez Arcos, V.H., Mendez de la Cruz, F.R. & Murphy, R. W. (2013). Landscape genetics of leaf-toed geckos in the tropical dry forest of Northern Mexico. – PLoS ONE 8(2): e57433.
Blumgart, D., Dolhem, J. & Raxworthy, C.J. (2017). Herpetological diversity across intact and modified habitats of Nosy Komba Island, Madagascar. – Journal of Natural History 51(11-12): 625-642.
Branch, W.R. (1998). Field Guide to Snakes and Other Reptiles of Southern Africa. 3rd edition. – Struik Publishers, Cape Town, South Africa.
Branch, W.R., Shine, R., Harlow, P.S. & Webb, J.K. (1997). Sexual dimorphism, diet and aspects of reproduction of the western keeled snake, Pythonodipsas carinata (Serpentes: Colubridae). – African Journal of Herpetology 46(2): 89-97.
Broadley, D.G. (1990). The herpetofaunas of the islands off the coast of south Moçambique. – Arnoldia Zimbabwe 9(35): 469-493.
Brown, R.M. (1999). New species of parachute gecko (Squamata: Gekkonidae: Genus Ptychozoon) from Northeastern Thailand and Central Vietnam. – Copeia 4: 990-1001.
Brown, R.M., Diesmos, A.C. & Duya, M.V. (2007) A new Luperosaurus (Squamata: Gekkonidae) from the Sierra Madre of Luzon Island, Philippines. – Raffles Bulletin of Zoology 55: 167-174.
Brown, R.M., McGuire, J.A., Ferner, J.W. & Alcala, A.C. (1999). New Species of Diminutive Scincid Lizard (Squamata; Lygosominae: Sphenomorphus) from Luzon Island, Republic of the Philippines. – Copeia 1999(2): 362-370.
Cádiz, A., Nagata, N., Katabuchi, M., Díaz, L.M., Echenique-Díaz, L.M., Akashi, H.D., Makino, T. & Kawata, M. (2013). Relative importance of habitat use, range expansion, and speciation in local species diversity of Anolis lizards in Cuba. – Ecosphere 4(7): 1-33.
Caicedo-Portilla, J.R. (2014). Rediscovery of Mabuya berengerae, Mabuya pergravis (Squamata: Scincidae) and Coniophanes andresensis (Squamata: Colubridae), and assessment of its threatened status in the San Andrés and Providencia Islands, Colombia. – Caldasia 36(1): 181-201.
Chapple, D.G., Daugherty, C.H., & Ritchie, P.A. (2008). Comparative phylogeography reveals pre-decline population structure of New Zealand Cyclodina (Reptilia: Scincidae) species. Biological Journal of the Linnean Society 95(2): 388-408.
Chettri, B., Bhupathy, S. & Acharya, B.K.. (2011). An overview of the herpetofauna of Sikkim with emphasis on the elevational distribution pattern and threats and conservation issues; pp. 233-254, in: M.L. Arrawatia and S. Tambe (eds.). Biodiversity of Sikkim: exploring and conserving a global hotspot. Gangtok: Information and Public Relations Department, Government of Sikkim.
Chuaynkern, Y., Nabhitabhata, J., Inthara, C., Kamsook, M. & Somsri, K. (2005). A new species of the water skink Tropidophorus (Reptilia: Squamata: Scincidae) from northeastern Thailand. – The Thailand Natural History Museum Journal 1: 165-176.
Cogger, H.G. (1972). A new scincid lizard of the genus Tribolonotus from Manus Island, New Guinea. – Zoologische mededeelingen 47 (1972): 202-210.
Colgan, D., Muir, G., Shea, G. & Cogger, H. (2006). A survey of the terrestrial reptiles of Norfolk Island. March 2005: Report 3. The levels of intraspecific genetic differentiation among island populations of the gekkonid lizard Christinus guentheri in the Norfolk Island complex.
Corn, M.J. (1981.) Ecological Separation of Anolis Lizards in a Costa Rican Rain Forest. Unpublished Ph.D. dissertation, University of Florida, Gainesville.
Couper, P.J., Cohen, M., Williams, S., and Couper, K.L.D. (1993). Reptile records for the Heathlands area, Cape York Peninsula. In: UNSPECIFIED, (ed.) Cape York Peninsula Scientific Expedition Wet Season 1992. Royal Geographical Society of Queensland, Brisbane, Qld, Australia, pp. 261-265.
van Damme, R. & Vanhooydonck, B. (2002). Speed versus manoeuvrability: association between vertebral number and habitat structure in lacertid lizards. – Journal of Zoology, 258(3): 327-334.
Darevsky, I.S. & Shcherbak, N.N. (1978). Eremias andersoni, a new lizard (Reptilia, Lacertilia, Lacertidae) from Iran. – Journal of Herpetology 12(1): 13-15.
Das, S., Campbell, P.D., Deuti, K., Bag, P. & Raha, S. (2019). A contribution to the systematics of Salea anamallayana (Beddome, 1878) and S. horsfieldii Gray, 1845 (Squamata: Agamidae: Draconinae). – Zootaxa 4563(3): 563-583.
Das, I. (2002). A photographic guide to snakes and other reptiles of India. New Holland Publishers (UK) Ltd., London, 144 pp.
Das, I. (2010). A Field Guide to the Reptiles of South-East Asia: Myanmar, Thailand, Laos, Cambodia, Vietnam, Peninsular Malaysia, Singapore, Sumatra, Borneo, Java, Bali, New Holland, London.
Das, S., Campbell, P.D., Deuti, K., Bag, P. & Raha, S. (2019). A contribution to the systematics of Salea anamallayana (Beddome, 1878) and S. horsfieldii Gray, 1845 (Squamata: Agamidae: Draconinae). – Zootaxa 4563(3): 563-583.
Daza, J.D., Aurich, J. & Bauer, A.M. (2012). Anatomy of an enigma: an osteological investigation of the Namibian festive gecko (Narudasia festiva: Gekkonidae: Gekkota). Acta Zoologica 93(4): 465-486.
d'Cruze, N.C., Sabel, J.A. (2005). The reptiles of southern Mikea Forest, Madagascar. – Herpetological Bulletin (3): 2-8.
d'Cruze, N.C., Sabel, J.A., Green, K., Dawson, J., Gardner, C.J., Robinson, J.E., Starkie, G., Vences, M. & Glaw, F. (2007). The first comprehensive survey of amphibians and reptiles at Montagne des Francais, Madagascar. – Herpetological Conservation and Biolgoy 2(2): 87-99.
Deepak, V. & Vasudevan, D. (2008). Density and microhabitat association of Salea anamallayana in Eravikulam National Park, Western Ghats, India. – Herpetological Journal 18: 165-170.
Demangel, M.D. (2016) Reptiles en Chile. – Fauna Nativa Ediciones, Santiago.
Díaz, L.M. & Hedges, B. (2009). First record of the genus Aristelliger (Squamata: Sphaerodactylidae) in Cuba, with the description of a new species. – Zootaxa 2028: 31-40.
Disi, A.M. (2011). Review of the lizard fauna of Jordan. – Zoology in the Middle East: 54: 89-102.
Dixon, J.R. (1960). The discovery of Phyllodactylus tuberculosus (Reptilia: Sauria) in Central America, the resurrection of P. xanti, and description of a new gecko from British Honduras. – Herpetologica 16(1): 1-11.
Doan, T.M., & Lamar, W.W. (2012). A new montane species of Cercosaura (Squamata: Gymnophthalmidae) from Colombia, with notes on the distribution of the genus. – Zootaxa 3565(1): 44.
Dujsebayeva, T.N., Malakhov, D.V., Berezovikov, N.N., Guo, X., Liu, J. & Cherednichenko, A. V. (2019). Comparative analysis of the distribution and habitats of two Eremias species (Reptilia, Lacertidae) using niche-based GIS modeling. – Russian Journal of Herpetology 26(5): 281.
Dunn, E.R. & Saxe, Jr., L.H. (1950). Results of the Catherwood-Chaplin West Indies Expedition, 1948. Part V. Amphibians and Reptiles of San Andrés and Providencia. – Proceedings of the Academy of Natural Sciences of Philadelphia 102: 141-165.
Duron, Q., Bourguet, E.,Thibault, M., Scussel, S., Gouyet, R., Méheut, M., & Vidal, E. (2019). Sympatric invasive rats Show different diets in a tropical rainforest of an island biodiversity hotspot. – Pacific Science 73(2): 199.
Easa, P.S. (1998). Survey of reptiles and amphibians in Kerala part of Nilgiri Biosphere Reserve. KFRI Research Report No.148. – Kerala Forest Research Institute, Peechi.
Fellers, G. & Drost, C. (1991). Ecology of the island night lizard, Xantusia riversiana, on Santa Barbara Island, California. Herpetological Monographs 5: 28-78.
Fitzsimons, J.A. (2017). Ecological notes on the three-banded parachute gecko (Ptychozoon trinotaterra) in Southern
Galford, G.L., Fernandez, M., Roman, J., Monasterolo, I., Ahamed, S., Fiske, G., González, P. & Kaufman, L. (2018). Cuban land use and conservation, from rainforests to coral reefs. – Bulletin of Marine Science 94(2).
Ganesh, S.R. (2007). A study on herpetofaunal assemblages in the rain forests of Western Ghats, Karnataka, India. – Scientific Transactions in Enviornment and Technovation 95-103.
Gangoso, L., Agudo, R., Anadón, J.D., de la Riva, M., Suleyman, A.S., Porter, R., & Donázar, J. A. (2013). Reinventing mutualism between humans and wild fauna: insights from vultures as ecosystem services providers. – Conservation Letters 6(3): 172-179.
Garrido, O.H. & Hedges, S.B. (1992). Three new grass anoles (Sauria: Iguanidae) from Cuba. Caribbean Journal of Science 28: 21-29.
Gill, B. & Whitaker, T. (2001). New Zealand frogs and reptiles. Auckland: David Bateman.	Hoddenbach, G. & Lannom, J. (1967). Notes on the natural history of the Mexican gecko, Phyllodactylus tuberculosus. – Herpetologica 23(4): 293-296.	Hoddenbach, G. & Lannom, J. (1967). Notes on the natural history of the Mexican gecko, Phyllodactylus tuberculosus. – Herpetologica 23(4): 293-296.	Hoddenbach, G. & Lannom, J. (1967). Notes on the natural history of the Mexican gecko, Phyllodactylus tuberculosus. – Herpetologica 23(4): 293-296.	Hoddenbach, G. & Lannom, J. (1967). Notes on the natural history of the Mexican gecko, Phyllodactylus tuberculosus. – Herpetologica 23(4): 293-296.	Hoddenbach, G. & Lannom, J. (1967). Notes on the natural history of the Mexican gecko, Phyllodactylus tuberculosus. – Herpetologica 23(4): 293-296.	Hoddenbach, G. & Lannom, J. (1967). Notes on the natural history of the Mexican gecko, Phyllodactylus tuberculosus. – Herpetologica 23(4): 293-296.	Hoddenbach, G. & Lannom, J. (1967). Notes on the natural history of the Mexican gecko, Phyllodactylus tuberculosus. – Herpetologica 23(4): 293-296.	Hoddenbach, G. & Lannom, J. (1967). Notes on the natural history of the Mexican gecko, Phyllodactylus tuberculosus. – Herpetologica 23(4): 293-296.	Hoddenbach, G. & Lannom, J. (1967). Notes on the natural history of the Mexican gecko, Phyllodactylus tuberculosus. – Herpetologica 23(4): 293-296.	Hoddenbach, G. & Lannom, J. (1967). Notes on the natural history of the Mexican gecko, Phyllodactylus tuberculosus. – Herpetologica 23(4): 293-296.	Hoddenbach, G. & Lannom, J. (1967). Notes on the natural history of the Mexican gecko, Phyllodactylus tuberculosus. – Herpetologica 23(4): 293-296.	Hoddenbach, G. & Lannom, J. (1967). Notes on the natural history of the Mexican gecko, Phyllodactylus tuberculosus. – Herpetologica 23(4): 293-296.	Hoddenbach, G. & Lannom, J. (1967). Notes on the natural history of the Mexican gecko, Phyllodactylus tuberculosus. – Herpetologica 23(4): 293-296.	Hoddenbach, G. & Lannom, J. (1967). Notes on the natural history of the Mexican gecko, Phyllodactylus tuberculosus. – Herpetologica 23(4): 293-296.	Hoddenbach, G. & Lannom, J. (1967). Notes on the natural history of the Mexican gecko, Phyllodactylus tuberculosus. – Herpetologica 23(4): 293-296.	Hoddenbach, G. & Lannom, J. (1967). Notes on the natural history of the Mexican gecko, Phyllodactylus tuberculosus. – Herpetologica 23(4): 293-296.	Hoddenbach, G. & Lannom, J. (1967). Notes on the natural history of the Mexican gecko, Phyllodactylus tuberculosus. – Herpetologica 23(4): 293-296.	Hoddenbach, G. & Lannom, J. (1967). Notes on the natural history of the Mexican gecko, Phyllodactylus tuberculosus. – Herpetologica 23(4): 293-296.	Hoddenbach, G. & Lannom, J. (1967). Notes on the natural history of the Mexican gecko, Phyllodactylus tuberculosus. – Herpetologica 23(4): 293-296.	Hoddenbach, G. & Lannom, J. (1967). Notes on the natural history of the Mexican gecko, Phyllodactylus tuberculosus. – Herpetologica 23(4): 293-296.	Hoddenbach, G. & Lannom, J. (1967). Notes on the natural history of the Mexican gecko, Phyllodactylus tuberculosus. – Herpetologica 23(4): 293-296.	Hoddenbach, G. & Lannom, J. (1967). Notes on the natural history of the Mexican gecko, Phyllodactylus tuberculosus. – Herpetologica 23(4): 293-296.	Hoddenbach, G. & Lannom, J. (1967). Notes on the natural history of the Mexican gecko, Phyllodactylus tuberculosus. – Herpetologica 23(4): 293-296.	Hoddenbach, G. & Lannom, J. (1967). Notes on the natural history of the Mexican gecko, Phyllodactylus tuberculosus. – Herpetologica 23(4): 293-296.	Hoddenbach, G. & Lannom, J. (1967). Notes on the natural history of the Mexican gecko, Phyllodactylus tuberculosus. – Herpetologica 23(4): 293-296.	Hoddenbach, G. & Lannom, J. (1967). Notes on the natural history of the Mexican gecko, Phyllodactylus tuberculosus. – Herpetologica 23(4): 293-296.	Hoddenbach, G. & Lannom, J. (1967). Notes on the natural history of the Mexican gecko, Phyllodactylus tuberculosus. – Herpetologica 23(4): 293-296.	Hoddenbach, G. & Lannom, J. (1967). Notes on the natural history of the Mexican gecko, Phyllodactylus tuberculosus. – Herpetologica 23(4): 293-296.	Hoddenbach, G. & Lannom, J. (1967). Notes on the natural history of the Mexican gecko, Phyllodactylus tuberculosus. – Herpetologica 23(4): 293-296.	Hoddenbach, G. & Lannom, J. (1967). Notes on the natural history of the Mexican gecko, Phyllodactylus tuberculosus. – Herpetologica 23(4): 293-296.	Hoddenbach, G. & Lannom, J. (1967). Notes on the natural history of the Mexican gecko, Phyllodactylus tuberculosus. – Herpetologica 23(4): 293-296.	Hoddenbach, G. & Lannom, J. (1967). Notes on the natural history of the Mexican gecko, Phyllodactylus tuberculosus. – Herpetologica 23(4): 293-296.	Hoddenbach, G. & Lannom, J. (1967). Notes on the natural history of the Mexican gecko, Phyllodactylus tuberculosus. – Herpetologica 23(4): 293-296.	Hoddenbach, G. & Lannom, J. (1967). Notes on the natural history of the Mexican gecko, Phyllodactylus tuberculosus. – Herpetologica 23(4): 293-296.	Hoddenbach, G. & Lannom, J. (1967). Notes on the natural history of the Mexican gecko, Phyllodactylus tuberculosus. – Herpetologica 23(4): 293-296.	Hoddenbach, G. & Lannom, J. (1967). Notes on the natural history of the Mexican gecko, Phyllodactylus tuberculosus. – Herpetologica 23(4): 293-296.	Hoddenbach, G. & Lannom, J. (1967). Notes on the natural history of the Mexican gecko, Phyllodactylus tuberculosus. – Herpetologica 23(4): 293-296.	Hoddenbach, G. & Lannom, J. (1967). Notes on the natural history of the Mexican gecko, Phyllodactylus tuberculosus. – Herpetologica 23(4): 293-296.	Hoddenbach, G. & Lannom, J. (1967). Notes on the natural history of the Mexican gecko, Phyllodactylus tuberculosus. – Herpetologica 23(4): 293-296.	Hoddenbach, G. & Lannom, J. (1967). Notes on the natural history of the Mexican gecko, Phyllodactylus tuberculosus. – Herpetologica 23(4): 293-296.	Hoddenbach, G. & Lannom, J. (1967). Notes on the natural history of the Mexican gecko, Phyllodactylus tuberculosus. – Herpetologica 23(4): 293-296.	Hoddenbach, G. & Lannom, J. (1967). Notes on the natural history of the Mexican gecko, Phyllodactylus tuberculosus. – Herpetologica 23(4): 293-296.	Hoddenbach, G. & Lannom, J. (1967). Notes on the natural history of the Mexican gecko, Phyllodactylus tuberculosus. – Herpetologica 23(4): 293-296.	Hoddenbach, G. & Lannom, J. (1967). Notes on the natural history of the Mexican gecko, Phyllodactylus tuberculosus. – Herpetologica 23(4): 293-296.	Hoddenbach, G. & Lannom, J. (1967). Notes on the natural history of the Mexican gecko, Phyllodactylus tuberculosus. – Herpetologica 23(4): 293-296.	Hoddenbach, G. & Lannom, J. (1967). Notes on the natural history of the Mexican gecko, Phyllodactylus tuberculosus. – Herpetologica 23(4): 293-296.	Hoddenbach, G. & Lannom, J. (1967). Notes on the natural history of the Mexican gecko, Phyllodactylus tuberculosus. – Herpetologica 23(4): 293-296.	Hoddenbach, G. & Lannom, J. (1967). Notes on the natural history of the Mexican gecko, Phyllodactylus tuberculosus. – Herpetologica 23(4): 293-296.	Hoddenbach, G. & Lannom, J. (1967). Notes on the natural history of the Mexican gecko, Phyllodactylus tuberculosus. – Herpetologica 23(4): 293-296.
Glaw, F. & Vences, M. (2007). A Field Guide to the Amphibians and Reptiles of Madagascar. Third Edition. M. Vences and F. Glaw Verlag GbR, Köln.
Goldberg, S.R. & Bursey, C.R. (2011). Helminths of two lizard species, Lepidophyma flavimaculatum and L. reticulatum (Squamata: Xantusiidae), from Costa Rica. – Phyllomedusa 10(1): 85-88.
Gómez-Díaz, E. Sindaco, R., Pupin, F., Fasola, M. & Carranza, S. (2012). Origin and in situ diversification in Hemidactylus geckos of the Socotra Archipelago. – Molecular Ecology 21(16): 4074-4092.
Gonwouo, L.N., Lebreton, M., Wild, C., Chirio, L., Ngassam, P. & Tchamba, M.N. Geographic and ecological distribution of the endemic montane chameleons along the Cameroon mountain range. – Salamandra 2006(42): 213-230.
Gonzalez, J.C., de Guia, A.P., Dimalibot, J., Pantua, K., Gustilo, W. & Bantayan, N. (2020). Understorey to canopy vertebrate fauna of a lowland evergreen forest in Mt. Makiling Forest Reserve, Philippines. – Biodiversity Data Journal 8.
Greer, A.E. (1991). Two new species of Menetia from Northeastern Queensland, with comments on the generic diagnoses of Lygisaurus and Menetia. – Journal of Herpetology 25(3): 268.
Harikrishnan, S. & Vasudevan, K. (2018). Niche dissociated assembly drives insular lizard community organization. – Scientific Reports 8(1).
Hartmann, T. Chipich, H., Handschuh, M., Truong, N.Q. & Böhme, W. (2009). First record of Tropidophorus cocincinensis Duméril and Bibron, 1839 from Cambodia. – Herpetology Notes 2: 87-89.
Hedges, S.B. & Thomas, R. (2000). At the lower size limit in amniote vertebrates: A new diminutive lizard from the West Indies. – Caribbean Journal of Science 37(3).
Hoddenbach, G. & Lannom, J. (1967). Notes on the natural history of the Mexican gecko, Phyllodactylus tuberculosus. – Herpetologica 23(4): 293-296.
Hoskin, C.J. & Higgie, M. (2008). A new species of velvet gecko (Diplodactylidae: Oedura) from north-east Queensland, Australia. – Zootaxa 1788: 21-36.
Houssaye, A., Mazurier, A., Herrel, A., Volpato, V., Tafforeau, P., Boistel, R. & De Buffrénil, V. (2010). Vertebral microanatomy in squamates: structure, growth and ecological correlates. – Journal of Anatomy 217(6): 715-727.
How, R.A., Durrant, B., Smith, L.A. & Saleh, N. (1998). Emoia (Reptilia: Scincidae) from the Banda Arc islands of eastern Indonesia: Variation in morphology and description of a new species. – Records of the Western Australian Museum 19: 131-139.
Ikeuchi, I., Mori, A. & Hasegawa, M. (2005). Natural history of Phelsuma madagascariensis kochi from a dry forest in Madgascar. – Amphibia-Reptilia 26: 475-483.
Ineich, I. (2009). Bocourt’s Terrific Skink, Phoboscincus bocourti Brocchi, 1876 (Squamata, Scincidae, Lygosominae). In: Zoologia Neocaledonica 7. Biodiversity studies in New Caledonia (Grandcolas, P., ed.). Mémoires du Muséum national d’Histoire naturelle, Paris 198: 149-174.
Ineich, I., Glaw, F. & Vences, M. (2016). A new species of Blaesodactylus (Squamata: Gekkonidae) from Tsingy limestone outcrops in Namoroka National Park, north-western Madagascar. – Zootaxa 4109(5): 523.
Islam, M. & Saikia, P.K. (2013). Inventory and natural history of lizards in Jeypore Reserve Forest, Assam. Reptile Rap 15: 16-26.
Ito, R., Ikeuchi, I. & Mori, A. (2013). A day gecko darkens its body color in response to avian alarm calls. – Current Herpetology 32(1): 26-33.
Jackson, K. & Blackburn, D.C. (2010). A survey of amphibians and reptiles at degraded sites near Pointe-Noire, Kouilou Province, Republic of Congo. – Herpetological Conservation and Biology 5(3): 414-429.
Jacobsen, N.H.G, Kuhn, A.L., Jackman, T.R. & Bauer, A.M. (2014). A phylogenetic analysis of the southern African gecko genus Afroedura (Squamata: Gekkonidae), with the description of nine new species from Limpopo and Mpumalanga provinces of South Africa. – Zootaxa 3846(4): 451.
Jacobsen, N.H.G., Pietersen, E.W. & Pietersen, D.W. (2010). A preliminary herpetological survey of the Vilanculos Coastal Wildlife Sanctuary on the San Sebastian Peninsula, Vilankulo, Mozambique. – Herpetology Notes 3: 181-193.
James, C.D. & Shine, R. (2000). Why are there so many coexisting species of lizards in Australian deserts? – Oecologia 125: 127-141.
Jewitt, D. (2018). Vegetation type conservation targets, status and level of protection in KwaZulu-Natal in 2016. – Bothalia 48(1).
Ji, X., Lin, L.-H., Luo, L.-G., Lu, H.-L., Gao, J.-F. & Han, J. (2006). Gestation temperature affects sexual phenotype, morphology, locomotor performance, and growth of neonatal brown forest skinks, Sphenomorphus indicus. – Biological Journal of the Linnean Society 88(3): 453-463.
Karamiani, R., Rastegar-Pouyani, N., Rastegar-Pouyani, E., Akbarpour, M. & Damadi, E. (2015). Verification of the Minor Snake-eyed Skink, Ablepharus grayanus (Stoliczka, 1872) (Sauria: Scincidae), from Iran. – Zoology in the Middle East 61(3): 226-230.
Karunarathna, D.M.S.S. & Amarasinghe, A.A.T. (2013). Behavioral ecology and microhabitat use by Lyriocephalus scutatus (Linnaeus, 1758): A monotypic genus in Sri Lanka (Reptilia: Agamidae: Draconinae) with notes on the taxonomy. – Russian Journal of Herpetology 20(1): 1-15.
Karunarathna, D.M.S.S., Amarasinghe, A.A.T., Abeywardena, U.T.I., Asela, M.D.C., Jayaneththi, H.B. & Madurapperuma, P.L. (2010). Some observations of Cnemaspis podihuna Deraniyagala, 1944 (Reptilia: Gekkonidae) in Sri Lanka. – Gekko 6: 23-29.
Kästle, W. (1998). Studies on the ecology and behaviour of Sitana sivalensis spec. nov. In: Contributions to the herpetology of South-Asia (Nepal, India) (Schleich, H.H. & Kästle, W., eds.) – Fuhlrott-Museum, Wuppertal, p. 121-206.
Köhler, G., A. Schulze, and M. Vesely. (2005). Morphological variation in Norops capito (Peters, 1863), a wide-spread species in southeastern Mexico and Central America. –Salamandra 41(3): 129-136.
Kraus, F. (2005). The genus Nactus (Lacertilia: Gekkonidae): a phylogenetic analysis and description of two new species from the Papuan Region. – Zootaxa 1061(1).
Kraus, F. (2018). A New Species ofEmoia(Squamata: Scincidae) from Papua New Guinea. – Journal of Herpetology 52(4): 430-436.
Kunya, K., Pauwels, O.S.G., Sairum, P. & Taokratok, A. (2011). Squamata, Gekkonidae, Ptychozoon trinotaterra Brown, 1999: rediscovery in Thailand. Check List, 7(6), 820-822.
Kwon, J., Kim, S.G., Kim, S.W., Yun, S., Kim, H.J., Giri, S.S., Han, S.J., Oh, W.T., & Park, S.C. (2019). A Case of Mortality Caused by Aeromonas hydrophila in Wild-Caught Red-Eyed Crocodile Skinks (Tribolonotus gracilis). – Veterinary Sciences, 7(1): 4.
Lloyd, M., Inger, R.F. & King, F.W. (1968). On the diversity of Reptile and Amphibian species in a Bornean Rain Forest. – The American Naturalist 102(928): 497-515.
López-Victoria, M. & Daza, J.M. (2015). The endangered species Aristelliger georgeensis (Squamata: Sphaerodactylidae) in Roncador Cay, Colombian Caribbean. – Acta Biológica Colombiana 20(3): 221-224.
Losos, J.B. (2009). Lizards in an evolutionary tree: Ecology and adaptive radiation of anoles. – University of California Press, Berkeley.
Losos, J.B., Glor, R.E., Kolbe, J.J. & Nicholson, K. (2006). Adaptation, speciation, and convergence: a hierarchical analysis of adaptive radiation in Caribbean Anolis lizards. Annals of the Missouri Botanical Garden 93: 24-33.
Manamendra-Arachchi, K., Batuwita, S., & Pethiyagoda, R. (2007). A taxonomic revision of the Sri Lankan day-geckos (Reptilia: Gekkonidae: Cnemaspis), with description of new species from Sri Lanka and southern India. – Zeylanica 7(1) 9-122.
Mariaux, J. & Tilbury, C.R. (2006). The pygmy chameleons of the eastern Arc range (Tanzania): Evolutionary relationships and the description of three new species of Rhampholeon (Sauria: Chamaeleonidae). – The Herpetological Journal 16(3): 315-331.
Mautz, W. & Lopez-Forment, W. (1978). Observations on the Activity and Diet of the Cavernicolous Lizard Lepidophyma smithii (Sauria: Xantusiidae). – Herpetologica 34(3): 311-313.
McDiarmid, R.W. & Savage, J.M. (2005). The herpetofauna of the Rincón area, Península de Osa, Costa Rica, a Central American lowland evergreen forest site. M.A. Donnelly, B.I. Crother, C. Guyer, M.H. Wake, M.E. White (Eds.), Ecology and Evolution in the Tropics: A Herpetological Perspective, University of Chicago Press, Chicago, IL (2005), pp. 366-427.
McCoy, M. (2015). A Field Guide to the Reptiles of the Solomon Islands. – Michael McCoy, Kuranda.
Medina, M., Fernández, J.B., Charruau, P., de la Cruz, F.M. & Ibargüengoytía, N. (2016). Vulnerability to climate change of Anolis allisoni in the mangrove habitats of Banco Chinchorro Islands, Mexico. – Journal of Thermal Biology 58, 8-14.
Meiri, S., Brown, J.H., & Sibly, R.M. (2011). The ecology of lizard reproductive output. – Global Ecology and Biogeography 21(5): 592-602.
Menegon, M., Bracebridge, C., Owen, N. & Loader, S.P. (2011). Herpetofauna of Montane Areas of Tanzania. 4. Amphibians and Reptiles of Mahenge Mountains, with Comments on Biogeography, Diversity, and Conservation. – Fieldiana Life and Earth Sciences 4: 103-111.
Metallinou, M., Arnold, E.N., Crochet, P.-A., Geniez, P., Brito, J. C., Lymberakis, P., Baha El Din, S., Sindaco, R., Robinson, M., & Carranza, S. (2012). Conquering the Sahara and Arabian deserts: systematics and biogeography of Stenodactylus geckos (Reptilia: Gekkonidae). – BMC Evolutionary Biology 12(1): 258.
Meyer, A. & Mouton, P. le Fras N. (2007). Aggregation in Bibron's gecko, Chondrodactylus bibronii. – African Journal of Herpetology 56(2): 137-147.
Milto, K.D., Melnikov, D.A., Nazarov, R.A., Saber, S.A. & Nagy, A. (2018). Geographic Distribution: Ophisops elbaensis (Mount Elba Snake-eyed Lizard). – Herpetological Review 49 (4): 716.
Milto, K.D., Saber, S.A., Nagy, A.M., Nazarov, R.A., Melnikov, D.A. & Ananjeva, N.B. (2019). First report on the reptile diversity of Wadi El Gemal National Park, Eastern Desert, Egypt. – Russian Journal of Herpetology 26(3): 175.
Miralles, A. (2006). A new species of Mabuya (Reptilia, Squamata, Scincidae) from the Caribbean island of San Andrés, with a new interpretation of nuchal scales, a character of taxonomic importance. – Herpetological Journal 16: 1-7.
Miralles, A., Köhler, J., Glaw, F. & Vences, M. (2016). Species delimitation methods put into taxonomic practice: two new Madascincus species formerly allocated to historical species names (Squamata, Scincidae). –
Miralles, A., Jono, T., Mori, A., Gandola, R., Erens, J., Köhler, J., Glaw, F. & Vences, M. (2016). A new perspective on the reduction of cephalic scales in fossorial legless skinks (Squamata, Scincidae). – Zoologica Scripta 45(4): 380-393.
Moro, D. & Cullen, P. (2013). Termite mounds: more than just termites Termite mounds are home to much more than termites. New studies on Barrow Island Nature Reserve reveal a remarkable suite of creatures who inhabit these towering mounds of earth. Book Chapter.
Nafis, G. (2020). California herps - A guide to the amphibians and reptiles of California. Available at: http://www.californiaherps.com/ (accessed 21 December 2020).
Nguyen, T.Q., Nguyen, S.V., Orlov, N., Hoang, T.N., Böhme, W. & Ziegler, T. (2010) A review of the genus Tropidophorus (Squamata, Scincidae) from Vietnam with new species records and additional data on natural history. – Zoosystematics and Evolution 86: 5-19.
Novelli, I.A., Lucasa, P.D.S. & Santos, R.C. (2011). Reptilia, Squamata, Gymnophthalmidae, Heterodactylus imbricatus Spix, 1825: Filling gaps in the state of Minas Gerais. – Check List, 7(1): 030.
Nuñeza, O.M. & Galorio, A.H.N. (2015). Cave Herpetofauna of Siargao Island Protected Landscape and Seascape, Philippines. – World Journal of Environmentla BioSciences 4(1): 26-35.
Nussbaum, R.A. & Raxworthy, C.J. (1998). Revision of the genus Ebenavia Boettger (Reptilia: Squamata: Gekkonidae). – Herpetologica 54(1): 18-34.
Oliver, P.M., & Doughty, P. (2016). Systematic revision of the marbled velvet geckos (Oedura marmorata species complex, Diplodactylidae) from the Australian arid and semi-arid zones. – Zootaxa 4088(2): 151.
Oliver, P.M. & Parkin, T. (2014). A new phasmid gecko (Squamata: Diplodactylidae: Strophurus) from the Arnhem Plateau: more new diversity in rare vertebrates from northern Australia. – Zootaxa 3878(1): 37–48.
Oliver, P.M., Sistrom, M., Tjaturadi, B., Krey, K. & Richards, S. (2010). On the status and relationships of the gecko species Gehyra barea Kopstein 1926, with description of new specimens and a range extension. – Zootaxa 2354(1): 45.
Ota, H. (1987). Tree crevice as night shelters for a scincid lizard, Mabuya longicaudata. – Journal of Ethology 5: 92-94.
Ota, H., Sengoku, S. & Hikida, T. (1996). Two new species of Luperosaurus (Reptilia: Gekkonidae) from Borneo. Copeia 1996(2): 433-439.
Palacios-Aguilar, R., Santos-Bibiano, R. & Flores-Villela, O. (2018). A new species of Lepidophyma (Squamata: Xantusiidae) from the Pacific Lowlands of Guerrero, Mexico. – Journal of Herpetology 52(3): 327-331.
Parker, V. (2001). Mozambique. In: Fishpool, L.D.C., Evans, M.I. (Eds.), Important Bird Areas in Africa and Associated Islands: Priority Sites for Conservation. Newbury and Cambridge, UK. Pisces Publications and BirdLife International (BirdLife Conservation Series N° 11), pp. 627–638.
Pearson, R.G., Raxworthy, C.J., Nakamura, M. & Peterson, A.T. (2007). Predicting species distributions from small numbers of occurrence records: a test case using cryptic geckos in Madagascar. – Journal of Biogeography 34: 102-117.
Pellegrino, K.C.M., Brunes, T.O., Souza, S.M., Laguna, M.M., Avila-Pires, T.C.S., Hoogmoed, M.S. & Rodrigues, M.T. (2018). On the distinctiveness of Amapasaurus, its relationship with Loxopholis Cope 1869, and description of a new genus for L. guianensis and L. hoogmoedi (Gymnophthalmoidea/Ecpleopodini: Squamata). – Zootaxa, 4441(2): 332.
Perez-Martinez, C.A., Kamath, A., Herrel, A. & Losos, J.B. (2021). The anoles of La Selva: Niche partitioning and ecological morphology in a mainland community of Anolis lizards. Breviora (in print).
Pethiyagoda, R. & Manamendra-Arachchi, K. (1998). A revision of the endemic Sri Lankan agamid lizard genus Ceratophora Gray, 1835, with description of two new species. – Journal of South Asian Natural History 3: 1-50.
Poyarkov, N. Jr. A., Orlova, V.F. & Chirikova, M.A. (2014). The mitochondrial phylogeography and intraspecific taxonomy of the Steppe Racerunner, Eremias arguta (Pallas) (Lacertidae: Sauria, Reptilia), reflects biogeographic patterns in Middle Asia. – Zootaxa 3895(2): 208.
Price, B., Kutt, A.S., & McAlpine, C.A. (2010). The importance of fine-scale savanna heterogeneity for reptiles and small mammals. – Biological Conservation 143(11): 2504-2513.
Pui, Y.M. & Das, I. (2017). Rediscovery and redescription of Tropidophorus micropus van Lidth de Jeude, 1905 (Squamata: Sauria: Scincidae) from Sarawak, East Malaysia (Borneo). – Asian Herpetological Research 8(2): 147-150.
Pui, Y.M., Karin, B.R. & Bauer, A.M. & Das, I. (2017). A new species of Tropidophorus Duméril &amp; Bibron, 1839 (Squamata: Sauria: Scincidae) from Sarawak, East Malaysia (Borneo). – Zootaxa 4258(6): 539.
Ramirez, A.A., Perez, K., & Telemeco, R.S. (2020). Thermoregulation and thermal performance of crested geckos (Correlophus ciliatus) suggest an extended optimality hypothesis for the evolution of thermoregulatory set‐points. – Journal of Experimental Zoology Part A: Ecological and Integrative Physiology 335(1): 86-95.
Ramiro, C. N., Junior, M.T. & Rodrigues, M.T. (2017). Reproductive biology of three sympatric species of Gymnophthalmid lizards from the sand dunes of the middle São Francisco River, Bahia, Brazil. – South American Journal of Herpetology 12(1): 76-88.
Randrianantoandro, J.C., Andriantsimanarilafy, R.R., Rakotovololonalimanana, H., Hantalalaina E.F., Rakotondravony, D., Ramilijaona, O.R., Ratsimbazafy, J., Razafindrakoto, G.F. & Jenkens, R.K.B. (2009). Population assessments of chameleons from two montane sites in Madagascar. – Herpetological Conservation and Biology 5(1): 23-31.
Rangasamy, V., Sivaperuman, C., Gokulakrishnan, G. & Parthipan, P. (2018). Herpetofauna of Andaman and Nicobar Islands.In: Indian Hotspots (Sivaperuman, C. & Venkataraman, K., eds.). Springer, Singapore.
Rankin, P.R. (1979). A taxonomic revision of the genus Menetia (Lacertilia, Scincidae) in the Northern Territory. – Records of the Australian Museum 32(14): 491-499.
Rawat, Y.B., Bhattarai, S., Poudyal, L.P. & Subedi, N. (2020). Herpetofauna of Shuklaphanta National Park, Nepal. – Journal of Threatened Taxa 12(5): 15587-15611.
Raxworthy, C.J. & Nussbaum, R.A. (1993). Four new species of Amphiglossus from Madagascar (Squamata: Scincidae). – Herpetologica 49(3): 326-341.
Raxworthy, C.J., Pearson, R.G., Zimkus, B.M., Reddy, S., Deo, A.J., Nussbaum, R.A. & Ingram, C.M. (2008): 423-440.
Razzetti, E., Sindaco, R., Grieco, C., Pella, F., Ziliani, U., Pupin, F., Riservato, E., Pellitteri-Rosa, D., Butikofer, L., Suleiman, A.S., Al-Aseily, B.A., CArugati, C., Boncompagni, E. & Fasola, M. (2011). Annotated checklist and distribution of the Socotran Archipelago Herpetofauna (Reptilia). – Zootaxa, 2826(1).
Rej, J.E., & Joyner, T.A. (2018). Niche modeling for the genus Pogona (Squamata: Agamidae) in Australia: Predicting past (late Quaternary) and future (2070) areas of suitable habitat. – Peer J 6: 1-22.
Renous, S., Höfling, E. & Bels, V. (2008). Locomotion patterns in two South American Gymnophthalmid lizards: Vanzosaura rubricauda and Procellosaurinus tetradactylus. – Zoology 111(4): 295-308.
Rivas, G.A., Nunes, P.M.S., Dixon, J.R., Schargel, W.E., Caicedo, J.R., Barros, T.R., Camargo, E.G., & Barrio-Amorós, C.L. (2012). Taxonomy, Hemipenial Morphology, and Natural History of Two Poorly Known Species of Anadia (Gymnophthalmidae) from Northern South America. – Journal of Herpetology 46(1): 33-40.
Rodrigues, M.T., De Freitas, M.A. & Silva, T.F.S. (2009). New species of earless lizard genus Heterodactylus (Squamata: Gymnophthalmidae) from the Highlands of Chapada Diamantina, State of Bahia, Brazil. – Journal of Herpetology 43(4): 605-611.
Rosa, G.M., Noël, J. and Andreone, F. (2011). Confirming a new population of the endangered Paroedura masobe (Squamata: Gekkonidae) in the relict Betampona low elevation rainforest, eastern Madagascar. – Herpetology Notes 4: 405-407.
Rosler, H. (1984). First observation of bipedal locomotion in a gecko, Homopholis (Blaesodactylus) sakalava (Reptilia: Sauria: Gekkonidae). – The Journal of the Herpetological Association of Africa 30(1): 13-14.
Roy, P.S., Padalia, H., Chauhan, N., Porwal, M.C., Gupta, S., Biswas, S. & Jagdale, R. (2005). Validation of Geospatial model for biodiversity characterization at landscape level– a study in Andaman & Nicobar Islands, India. – Ecological Modelling 185: 349-369.
Ruthven, A.G. (1926). A new species of Anadia from the Santa Marta Mountains, Colombia. – Occasional Papers of the Museum of Zoology, University of Michigan 177: 1-3.
Sadlier, R.A. (1986). A review of the scincid lizards of New Caledonia. – Records of the Australian Museum 39: 1-66.
Sadlier, R.A., Bauer, A.M., Whitaker, A.H. & Smith, S.A. (2004). Two new species of Scincid lizards (Squamata) from the Massif de Kopeto, New Caledonia. – Proceedings of the California Academy of Sciences 55(11): 208-221.
Sanchez, M., Choeur, A., Bignon, F. & Laubin, A. (2019). Reptiles of the Iles Eparses, Indian Ocean: Inventory, distribution, and conservation status. – Herpetological Conservation and Biology 14(2).
Savage, J. M. 2002. The amphibians and reptiles of Costa Rica: A herpetofauna between two continents, between two seas. University of Chicago Press.
Schettino, L.R., Losos, J.B., Hertz, P.E., de Queiroz, K., Chamizo, A.R., Leal, M. & González, V.R. (2010). The Anoles of Soroa: Aspects of their ecological relationships. – Breviora 520(1): 1-22.
Schettino, L.R., Mancina, C.A. & González, V.R. (2013). Reptiles of Cuba: checklist and geographic distributions. – Smithsonian Herpetological Information Service 1-96.
Schmitz, A., Brandley, M.C., Mausfeld, P., Vences, M., Glaw, F., Nussbaum, R.A., & Reeder, T. W. (2005). Opening the black box: phylogenetics and morphological evolution of the Malagasy fossorial lizards of the subfamily “Scincinae.” – Molecular Phylogenetics and Evolution 34(1): 118-133.
Shea, G., Jourdan, H., Sadlier, R. & Bauer, A. (2009). Natural history of the New Caledonian whiptailed skink Tropidoscincus variabilis (Bavay, 1869) (Squamata: Scincidae). – Amphibia-Reptilia 30(2): 207-220.
SimÓ-Riudalbas, M., Tarroso, P., Papenfuss, T., Al-Sariri, T. & Carranza, S. (2018). Systematics, biogeography and evolution of Asaccus gallagheri (Squamata, Phyllodactylidae) with the description of a new endemic species from Oman. – Systematics and Biodiversity 16(4): 323-339.
Smith, S.A., Sadlier, R.A., Bauer, A.M., Austin, C.C., & Jackman, T. (2007). Molecular phylogeny of the scincid lizards of New Caledonia and adjacent areas: Evidence for a single origin of the endemic skinks of Tasmantis. – Molecular Phylogenetics and Evolution 43(3): 1151-1166.
Skipwith, P., Jackman, T., Whitaker, A.H., Bauer, A.M. & Sadlier, R.A. (2014). New data on Dierogekko (Squamata: Gekkota: Diplodactylidae), with the description of a new species from Ile Baaba, Province Nord, New Caledonia. – Memoires du Museum National d'Histoire Naturelle 206: 13-30.
Sloggett, J.J. (2018). Field observations of putative bone-based fluorescence in a gecko. – Current Zoology 64(3): 319-320.
Snyman-Van der Walt, L., Kellerman, L. & Todd, S. (2020). Nama Karoo, Succulent Karoo and Desert Biomes. In: Strategic Environmental Assessment for Expansion of Electricity Grid Infrastructure in South Africa: Biodiversity and Ecological Impacts (Terrestrial Ecosystems and Species) - Succulent and Nama Karoo Biomes.
Solania, C.L., de Venancio, S.P.R. & Gamalinda, E.F. (2020). A Preliminary Study of Herpetofauna and their Microhabitats in Pagatpatan Wetland Center, Caraga Region, Philippines. – Journal of Ecosystem Sciences and Eco-Governance 2(1): 1-12.
Storr, G.M. (1974). Agamid lizards of the genera Caimanops, Physignathus and Diporiphora in Western Australia and Northern Territory. Records of the Western Australian Museum 3: 121-146.
Storr, G.M. (1975). The genus Proablepharus (Scincidae, Lacertilia) in Western Australia. – Records of the Western Australian Museum 3: 4.
Stuart, B.L., Rowley J.J.L., Neang, T., Emmett, D.A. & Sitha S. (2010). Significant new records of amphibians and reptiles from Virachey National Park, northeastern Cambodia. – Cambodian Journal of Natural History 2010: 38-47.
Sung, Y.-H., Karraker, N.E. & Hau, B.C.H. (2012). Terrestrial herpetofaunal assemblages in secondary forests and exotic Lophostemon confertus plantations in South China. – Forest Ecology and Management 270: 71-77.
Tamar, K., Simó-Riudalbas, M., Garcia-Porta, J., Santos, X., Llorente, G., Vasconcelos, R. & Carranza, S. (2019). An integrative study of island diversification: Insights from the endemic Haemodracon geckos of the Socotra Archipelago. – Molecular Phylogenetics and Evolution 133: 166-175.
Teynié, A., David, P., Ohler, A. & Luanglath, K. (2004). Notes on a collection of amphibians and reptiles from southern Laos, with a discussion of the occurrence of Indo-Malayan species. – Hamadryad 29: 33-62.
Thibault, M., Brescia, F., Jourdan, H., & Vidal, E. (2017). Invasive rodents, an overlooked threat for skinks in a tropical island hotspot of biodiversity. – New Zealand Journal of Ecology 41(1).
Towns, D.R. (1994). The role of ecological restoration in the conservation of Whitaker’s skink (Cyclodina whitakeri), a rare New Zealand lizard (Lacertilia: Scincidae). – New Zealand Journal of Zoology 21: 457-471.
Towns, D.R. & Elliott, G.P. (1996). Effects of habitat structure on distribution and abundance of lizards at Pukerua Bay, Wellington, New Zealand. – New Zealand Journal of Ecology 20(2): 191-206.
Towns, D.R. & Ferreira, S.M. (2001). Conservation of New Zealand lizards (Lacertilia: Scincidae) by translocation of small populations. – Biological Conservation 98(2): 211-222.
Urbazaev, M., Thiel, C., Cremer, F., Dubayah, R., Migliavacca, M., Reichstein, M. & Schmullius, C. (2018). Estimation of forest aboveground biomass and uncertainties by integration of field measurements, airborne LiDAR, and SAR and optical satellite data in Mexico. – Carbon Balance and Management 13(1).
Villard, P., Duval, T., Papineau, C., Cassan, J.-J., & Fuchs, J. (2019). Notes on the biology of the threatened Island Thrush Turdus poliocephalus xanthopus in New Caledonia. – Bird Conservation International, 29(4), 616-626.
Villeneuve, A.R. (2017). Habitat selection and population density of the world’s smallest chameleon, Brookesia micra, on Nosy Hara, Madagascar. – Herpetological Conservation and Biology 12(2).
Vitt, L.J. & Zani, P.A. (2005). Ecology and reproduction of Anolis capito in rain forest of southeastern Nicaragua. – Journal of Herpetology 39: 36-42.
Wickramasinghe, M. & Somaweera, R. (2002). Endemic geckos of Sri Lanka. – Gekko 3: 1-3.
Wiles, G.J., & Conry, P.J. (1990). Terrestrial vertebrates of the Ngerukewid Islands Wildlife Preserve, Palau Islands. – Micronesica 23: 41-66.
Williams, S.E., ed. (2006). Vertebrates of the wet tropics rainforests of Australia: Species distributions and biodiversity. – Cooperative Research Centre for Tropical Rainforest Ecology and Management. Rainforest CRC, Cairns, Australia.
Wilson, S. & Swan, G., eds. (2017). A complete guide to reptiles of Australia. – New Holland.
Woinarski, J.C.Z. & Gambold, N. (1992). Gradient analysis of a tropical herpetofauna: distribution patterns of terrestrial reptiles and amphibians in Stage III of Kakadu National Park, Australia. – Wildlife Research 19(2): 105-127.
Zaaf, A. & van Damme, R. (2001). Limb proportions in climbing and ground-dwelling geckos (Lepidosauria, Gekkonidae): a phylogenetically informed analysis. – Zoomorphology 121(1): 45-53.
[truncated: 199 more columns]
